# Supplementary material
Source: MDPI journal article supplement (https://www.mdpi.com/2073-4352/12/5/578)
Supplement: s1 [file s1]

## Supporting Information

### Enhancement of Protein Crystallization Using Nano-Sized Metal– Organic Framework

Xianfang Zhang <sup>1,2</sup>, Zhengtao Xu <sup>3</sup>, Jiahai Zhou <sup>2</sup>, Xiwen Xing <sup>1,\*</sup> and Long Li <sup>2,\*</sup>

<sup>1</sup> Guangdong Provincial Key Laboratory of Bioengineering Medicine, Department of Cell Biology, College of Life Science and Technology, Jinan University, Guangzhou, China; zhangxf@stu2019.jnu.edu.cn; xingxiwen0025@sina.com

<sup>2</sup> CAS Key Laboratory of Quantitative Engineering Biology, Shenzhen Institute of Synthetic Biology, Shenzhen Institute of Advanced Technology, Chinese Academy of Sciences, Shenzhen, 518055 China; long.li@siat.ac.cn

<sup>3</sup> Department of Chemistry, City University of Hong Kong, 83 Tat Chee Avenue, Kowloon, Hong Kong, China; zhengtao@cityu.edu.hk

\* Correspondence: xingxiwen0025@sina.com; long.li@siat.ac.cn

**Optical microscope image of EgtB crystals in presence of nano-size MOF particles**

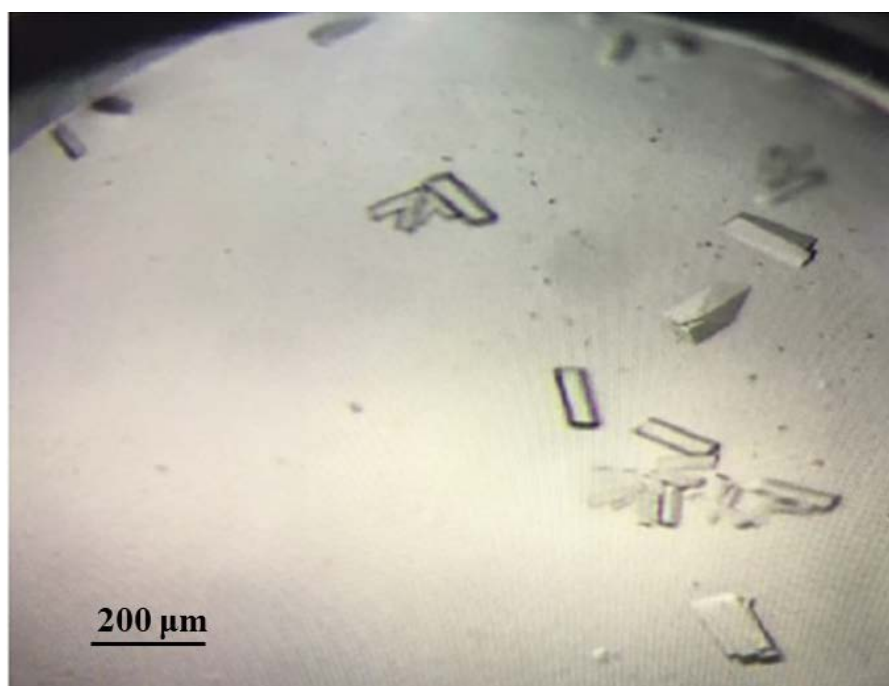

Figure S1. Optical microscope image of EgtB crystals in presence of nano-size MOF particles.

**X-ray diffraction of EgtB crystals prepared by using nano-size MOF particles**

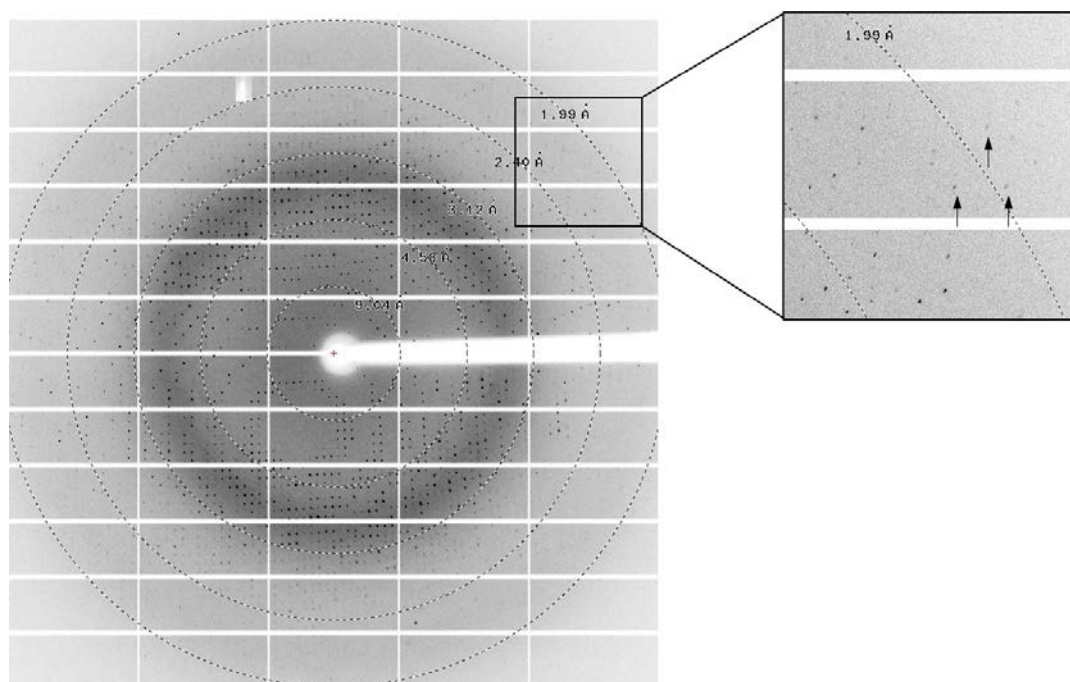

Figure S2. X-ray diffraction of EgtB crystals prepared by using nano-size MOF particles.
